# Supplementary material for: Unique subcellular distribution of RPB1 with a phosphorylated C-terminal domain (CTD) in mouse oocytes during meiotic division and its relationship with chromosome separation
Source: PubMed Central journal article supplement — J Reprod Dev. 2015 Sep 4;61(6):541–8. doi: 10.1262/jrd.2015-051 (PMC4685220; doi:10.1262/jrd.2015-051), 2015-09-04
Supplement: jrd-61-541-s001.pdf [file jrd-61-541-s001.pdf]

### Supplementary Figure. S1

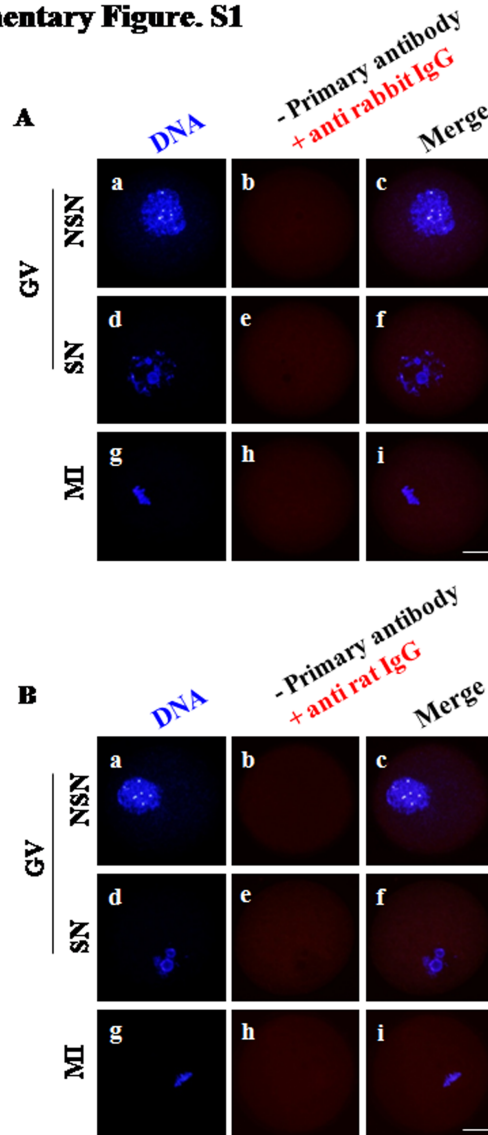

#### Supplementary Fig. 1.

**A: Negative control for pRPB1<sup>Ser2</sup> or pRPB1<sup>Ser5</sup> localization in mouse oocytes during meiosis.** During the immunofluorescence procedure, the rabbit antibody to pRPB1<sup>Ser2</sup> or pRPB1<sup>Ser5</sup> was omitted, and only the secondary antibody, Alexa 594-conjugated goat anti-rabbit IgG (1:500), was added. No immunofluorescence signal was observed at the GV and MI stages (b, e, h). DNA was visualized in blue. Scale bar = 20  $\mu$ m. **B: Negative control for pRPB1<sup>Ser7</sup> localization in mouse oocytes during meiosis.** Oocyte samples were not incubated with the rat antibody to pRPB1<sup>Ser7</sup> but were processed with only the secondary antibody, rhodamine-conjugated goat anti-rat IgG (1:500). No signal of pRPB1<sup>Ser7</sup> was detected in both GV and MI oocytes (b, e, h). DNA was visualized in blue. Scale bar = 20  $\mu$ m.
